# Supplementary material for: Self-Aligned Interdigitated Transducers for Acoustofluidics
Source: MDPI journal article supplement (doi:10.3390/mi7120216), 2016-11-25
Supplement: s1 [file s1]

# Supplementary Materials: Self-Aligned Interdigitated Transducers for Acoustofluidics

Zhichao Ma, Adrian J. T. Teo, Say Hwa Tan, Ye Ai and Nam-Trung Nguyen

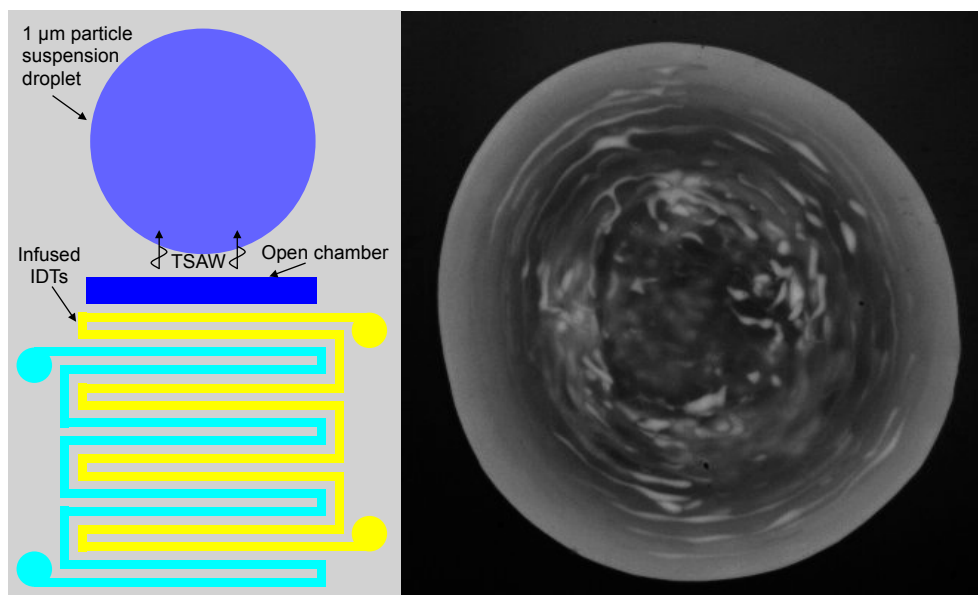

**Figure S1.** Traveling surface acoustic wave (TSAW)-based droplet streaming experiment. A 0.5  $\mu\text{L}$  droplet with a 1  $\mu\text{m}$  fluorescent particle suspension is placed in the direction of the traveling SAW generated from the infused interdigital transducers (IDTs). The uneven acoustic pressure distribution induces a streaming vortex within the droplet. Simultaneously, the incident acoustic waves interfere with the reflected acoustic waves from the droplet/air interface, thus forming a standing acoustic field within the droplet. Some of the suspended particles are aggregated to the pressure nodes in a complex pattern. The video of the particle movement and streaming flow pattern in the droplet is shown in the Supplementary video S2.

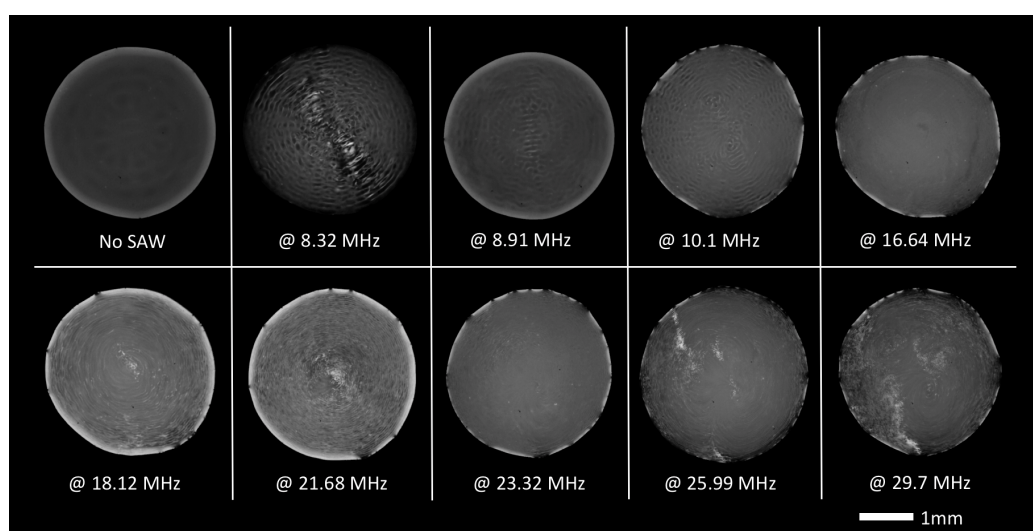

**Figure S2.** Droplet streaming at different resonance frequencies. The 0.5  $\mu\text{L}$  droplets loaded with 0.02% volume ratio of fluorescent particles (PSF001UM, Magsphere) were pipetted and placed at about 7 mm away from the IDT. Complex standing wave formations and flow patterns were observed at different resonance frequencies. Temperature measurements at various locations show a negligible increase when the input voltage is fixed at 200 mV.
