# Supplementary material for: Self-Aligned Interdigitated Transducers for Acoustofluidics
Source: Micromachines (Basel). 2016 Nov 25;7(12):216. doi: 10.3390/mi7120216 (PMC6189727; doi:10.3390/mi7120216)
Supplement: Supplementary file 1 [file micromachines-07-00216-s001.zip]

Archive with 4 entries (4 files):
- micromachines-162819-suppl.pdf
- Video S1.avi
- Video S2.avi
- Video S3.avi
